# Supplementary material for: Maternal education gradients in early life height: A comparative study of eight Latin American countries
Source: Research Square preprint supplement (doi:10.21203/rs.3.rs-237177/v1), 2021-03-01
Supplement: Supplementary file 1 [file 945e6c3df838768c92b7f604.docx]

(1)

In the second set of analyses, we estimated a series of logistic regression models to predict the probability of a child being stunted. Equation (2) presents the model structure:

(2)

where and is the dichotomous stunting outcome for the “*i*”child; is the categorical variable for maternal educational level; and is the matrix of the observed child, mother, and household characteristics.
